# Supplementary material for: In vivo detection of programmed cell death during mouse heart development
Source: PubMed Central journal article supplement (PMC7205869; doi:10.1038/s41418-019-0426-2), 2019-09-30

# Supplementary Figure 1

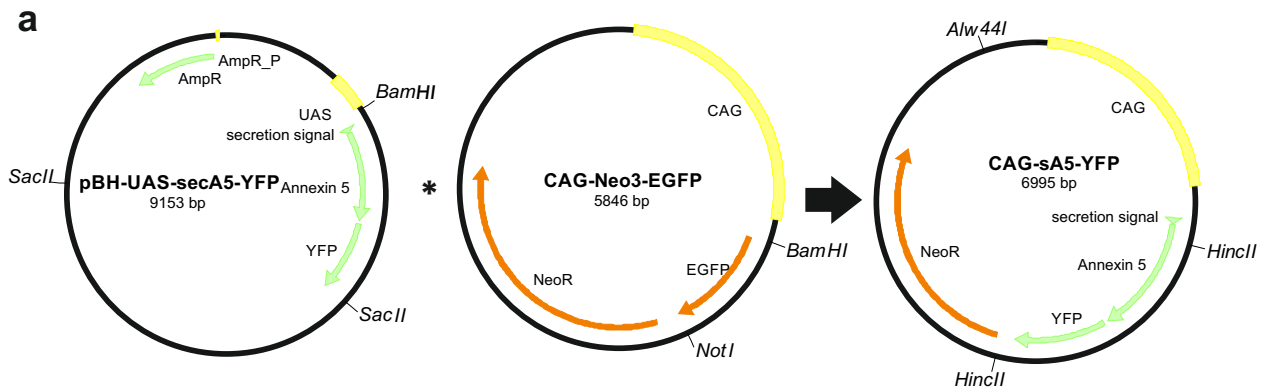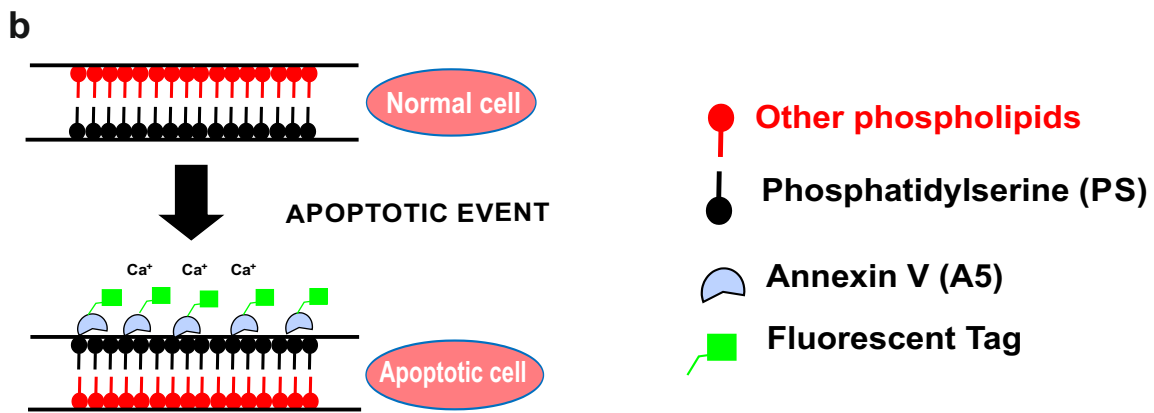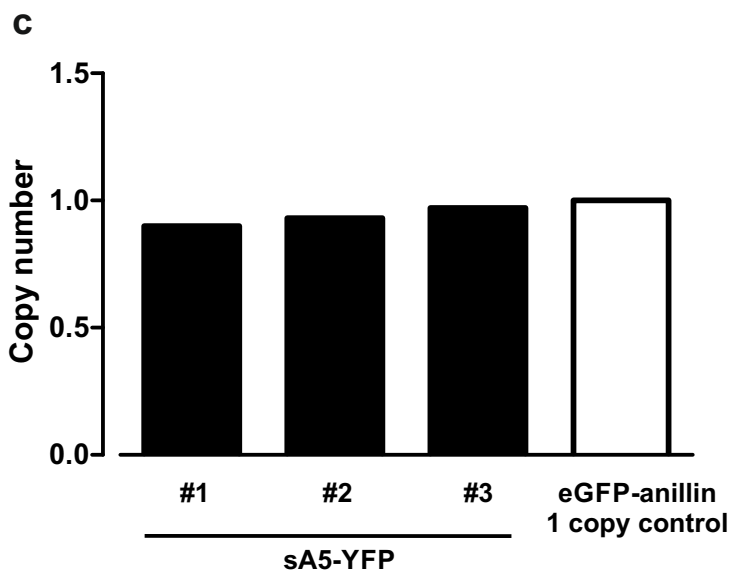

# Supplementary Figure 2

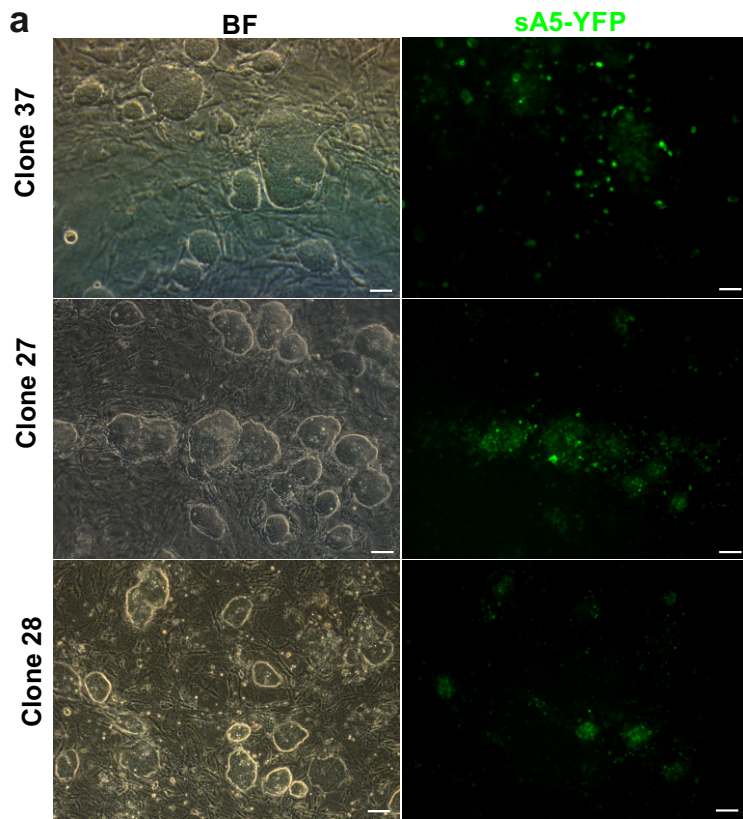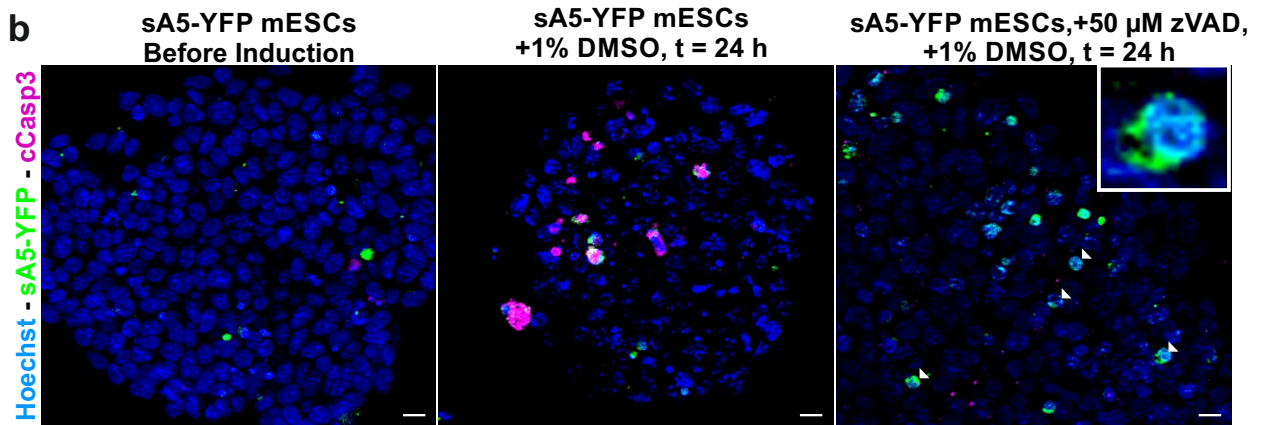

# Supplementary Figure 3

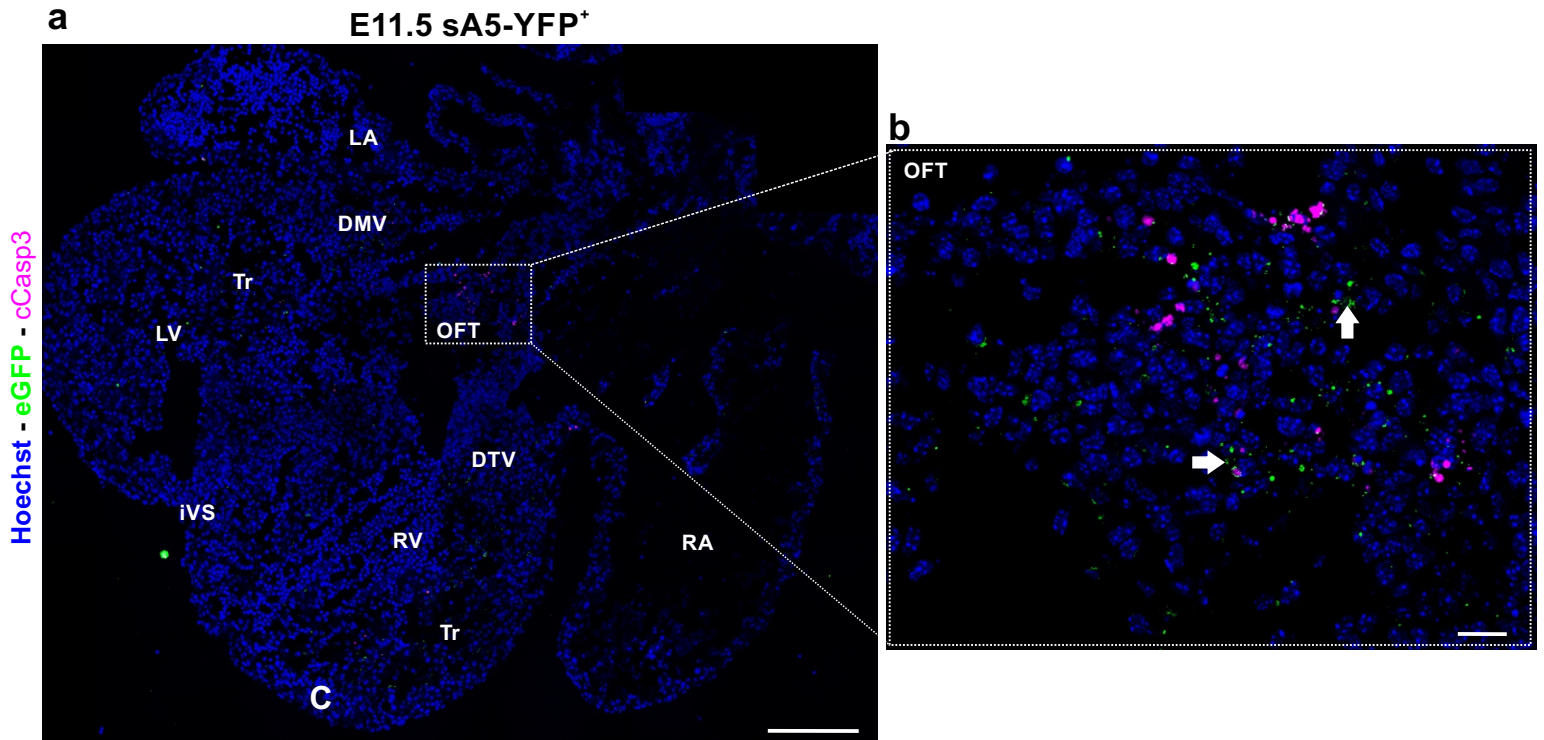



# Supplementary Figure 4

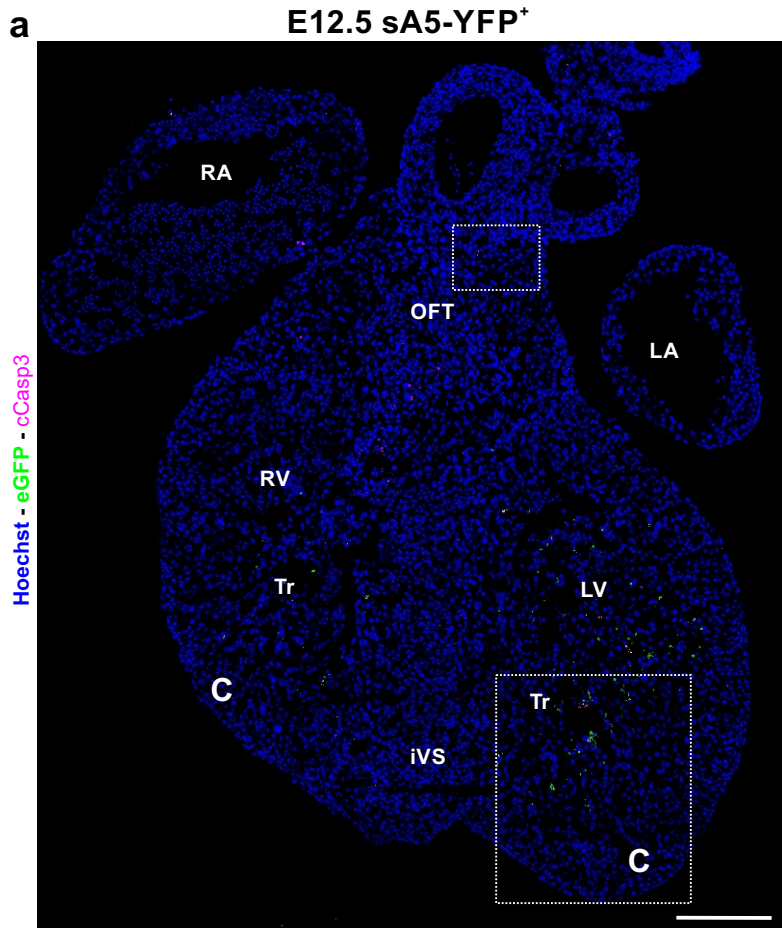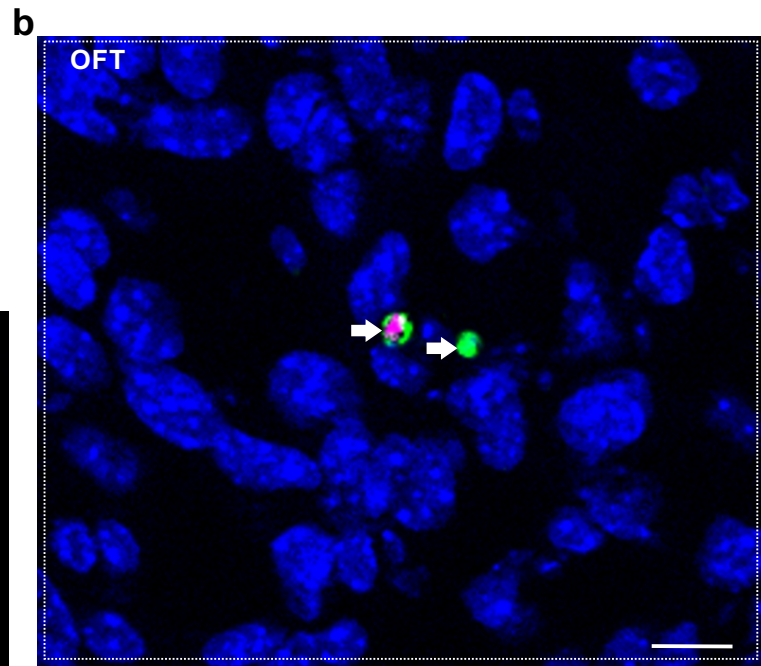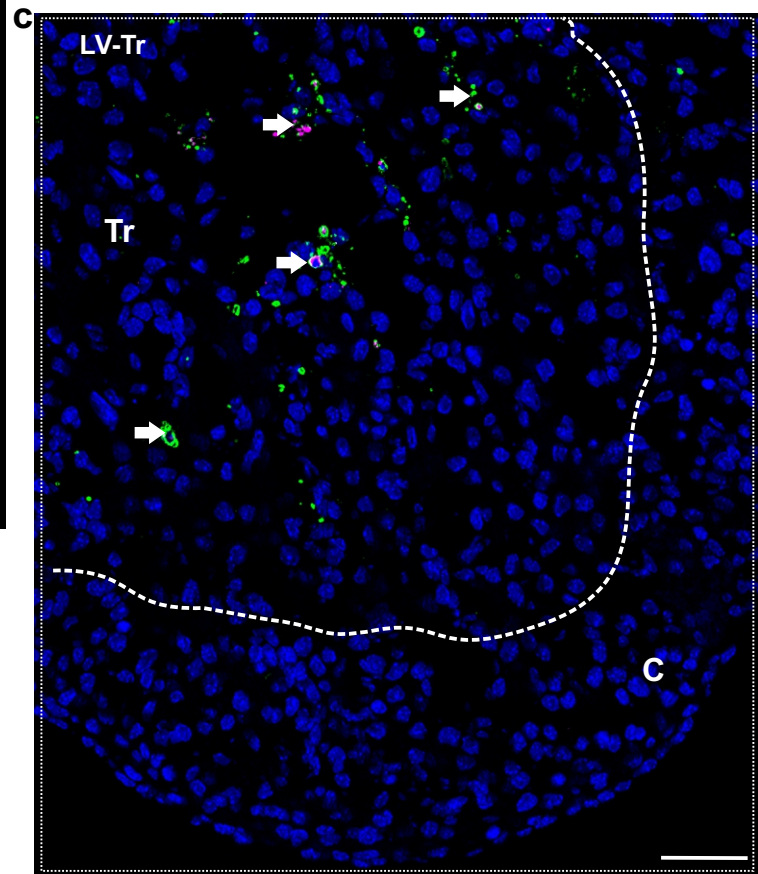

# Supplementary Figure 5

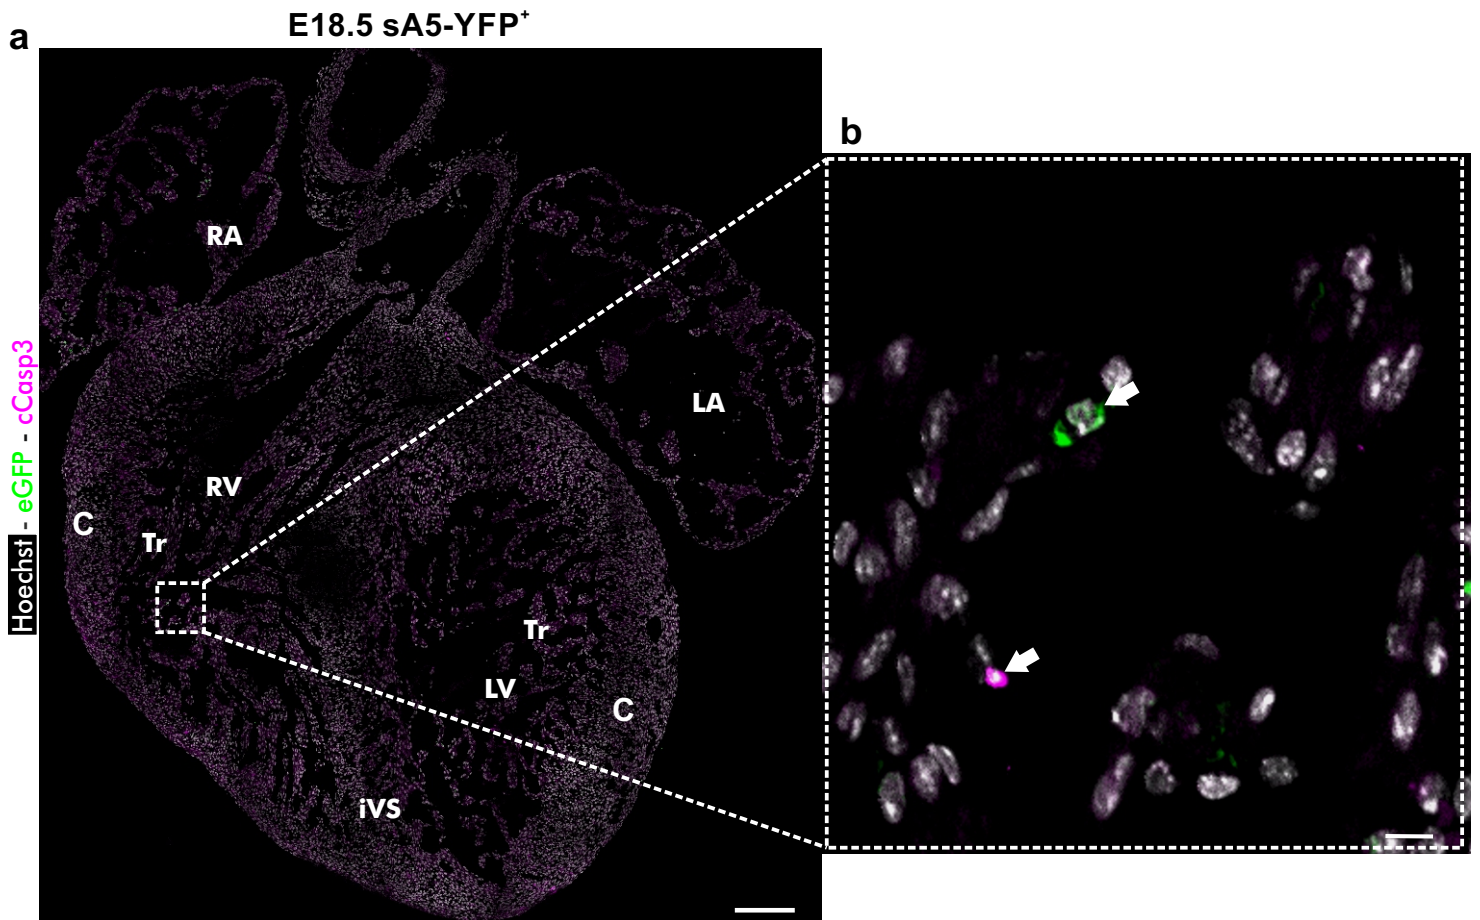

# Supplementary Figure 6

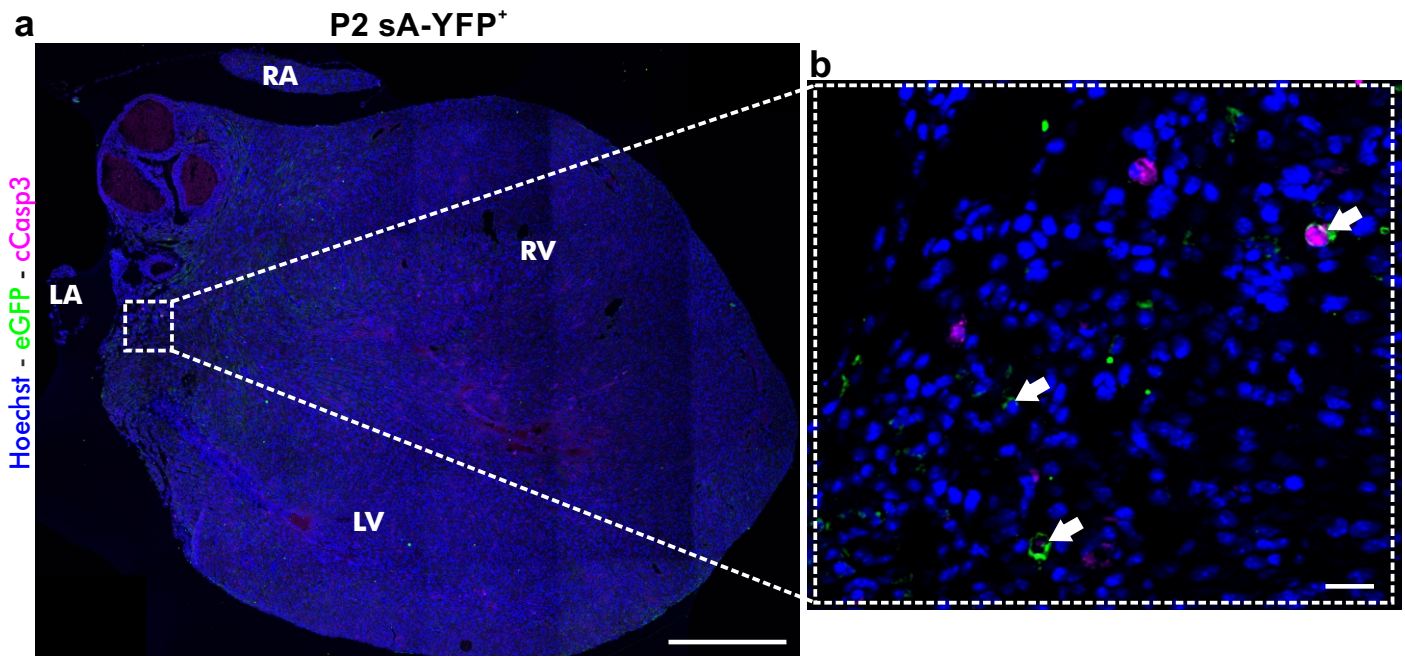



# Supplementary Figure 7

**a**

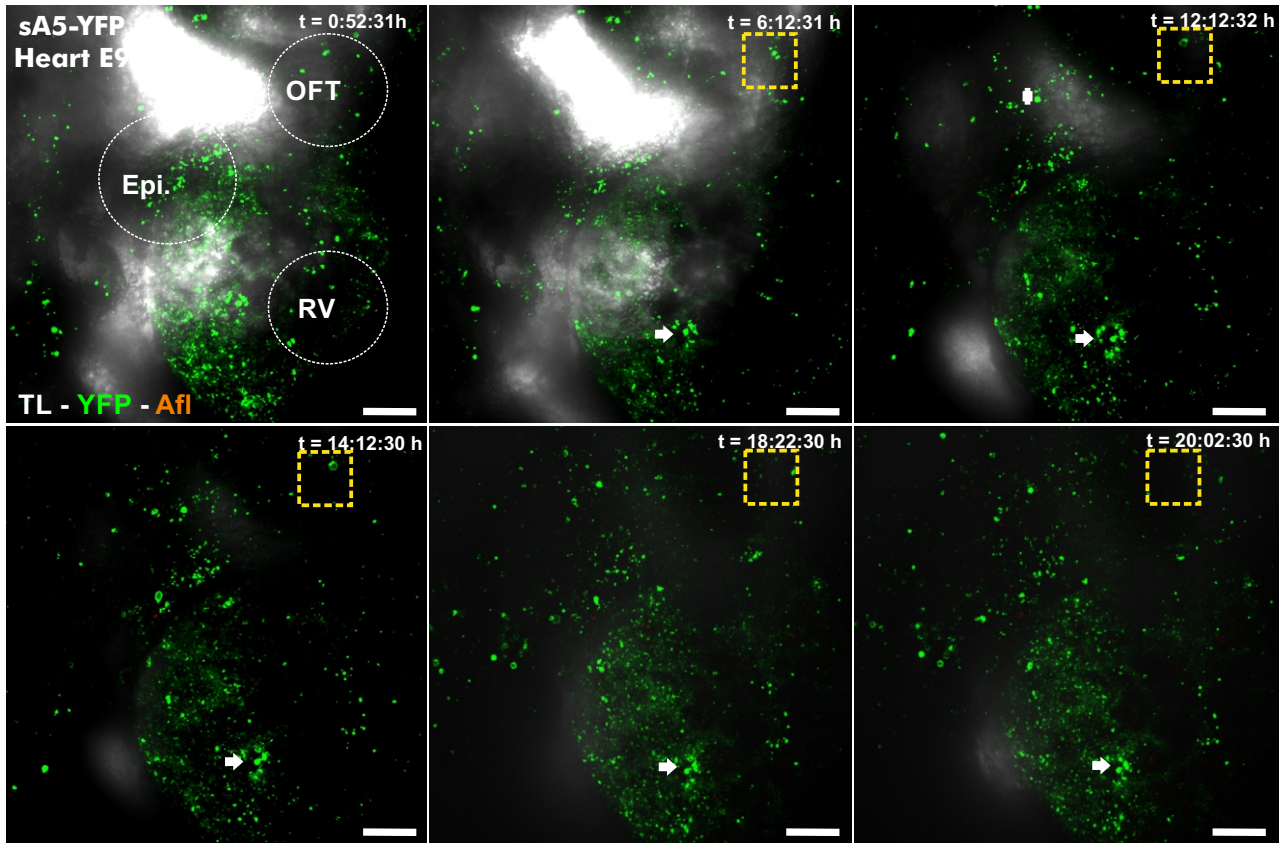

**b**

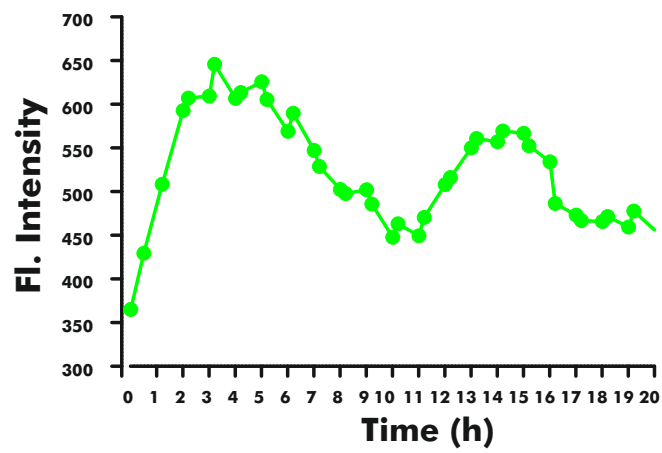

# Supplementary Figure 8

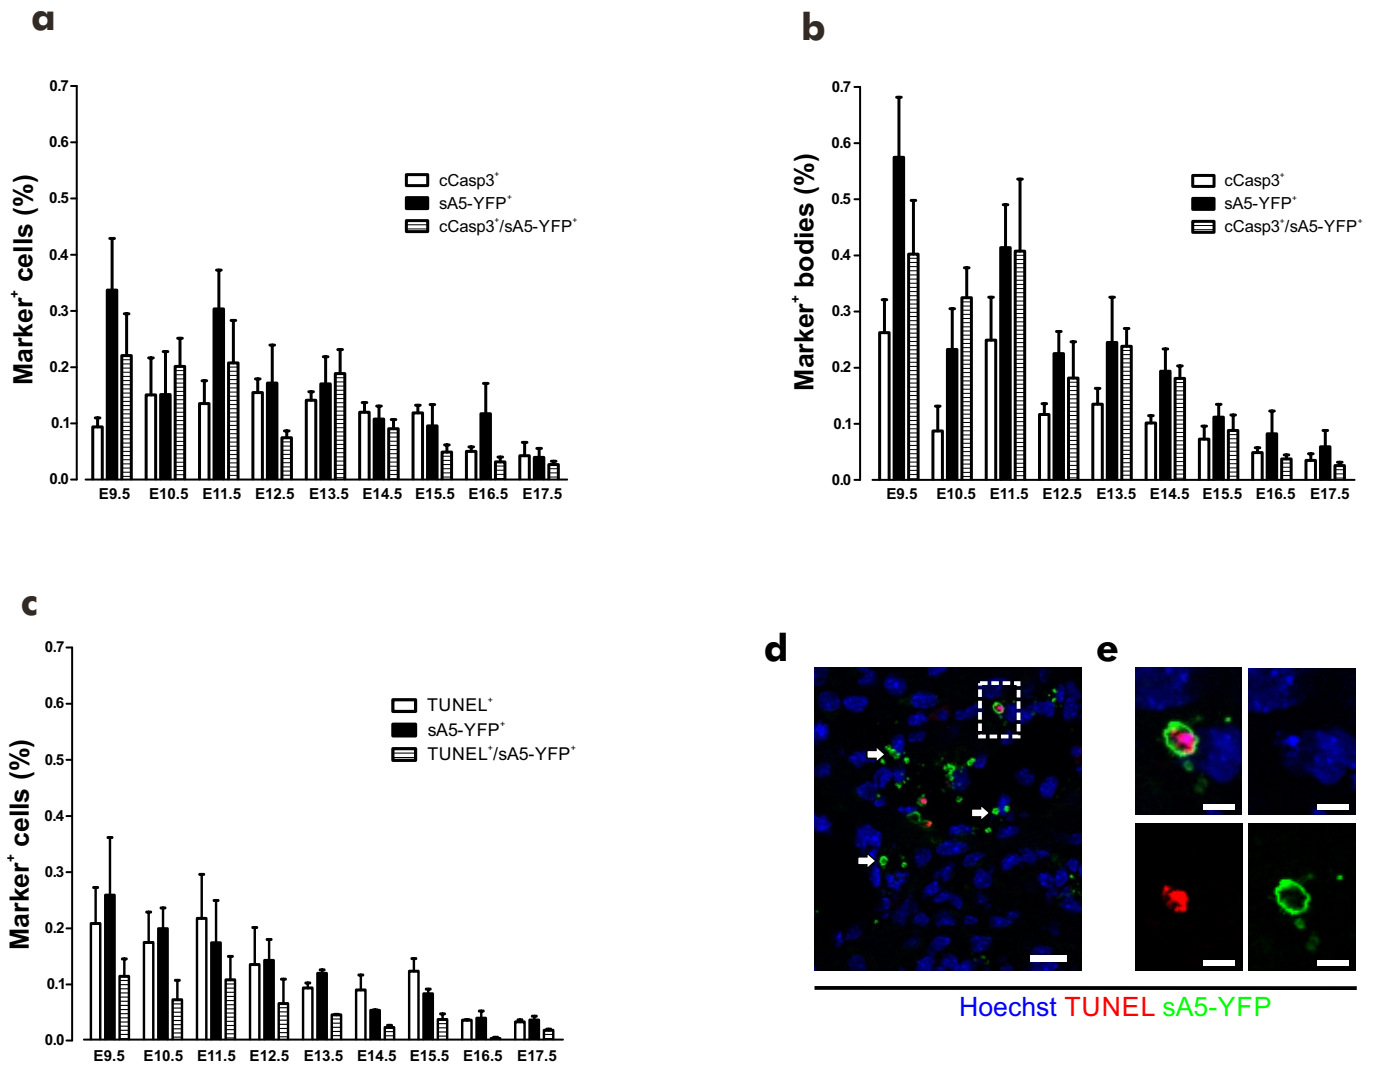

Supplement: 41418_2019_426_MOESM2_ESM.pdf [file 41418_2019_426_MOESM2_ESM.pdf]
